# Supplementary material for: Epizootic reptilian ferlavirus infection in individual and multiple snake colonies with additional evidence of the virus in the male genital tract
Source: PubMed Central journal article supplement (PMC8208991; doi:10.1038/s41598-021-92156-5), 2021-06-16
Supplement: 41598_2021_92156_MOESM1_ESM.pdf [file 41598_2021_92156_MOESM1_ESM.pdf]

**Epizootic reptilian ferlavirus infection in individuals and multiple snake colonies with additional evidence of the virus in male genital tract**

**Chutchai Piewbang<sup>1,2</sup>, Sabrina Wahyu Wardhani<sup>2,3</sup>, Panida Poonsin<sup>1,2</sup>, Poowadon Chai-in<sup>4</sup>, Sitthichok Lacharoje<sup>1</sup>, Thanyarat Saengdet<sup>5</sup>, Taksa Vasaruchapong<sup>6</sup>, Suwimon Boonrungsiman<sup>4</sup>, Piyaporn Kongmakee<sup>7</sup>, Wijit Banlunara<sup>1</sup>, Anudep Rungsipipat<sup>1</sup>, Tanit Kasantikul<sup>8</sup>, Somporn Techangamsuwan<sup>1,2,\*</sup>**

**Supplementary Table S1.** Primer sets used for whole genome characterization of reptilian ferlavirus

| <b>Direction</b> | <b>Primer name</b> | <b>Primer sequences (5'-3')</b> |
|------------------|--------------------|---------------------------------|
| <b>Forward</b>   | FerP1_44F          | TAAGTTGAAATTAGGATCA             |
| <b>Reverse</b>   | FerP1_1381R        | GACATGTTTGGCTC                  |
| <b>Forward</b>   | FerP2_912F         | TATGGTATAAACACACGCTC            |
| <b>Reverse</b>   | FerP2_1748R        | CACCAGTCTCCACATTGAT             |
| <b>Forward</b>   | FerP3_1728F        | CAATCAATGTGGAGACTG              |
| <b>Reverse</b>   | FerP3_2836R        | GGTAATACGGGAACACA               |
| <b>Forward</b>   | FerP4_2789F        | ATATTTGAGGTYTGGGA               |
| <b>Reverse</b>   | FerP4_4137R        | CCTGTGATGAYACTTTCA              |
| <b>Forward</b>   | FerP5_3960F        | GAAACACCAGATGCAC                |
| <b>Reverse</b>   | FerP5_5128R        | TCAAACATRACCCCTA                |
| <b>Forward</b>   | FerP6_4964F        | TAG GAG CAA AGY TCTT            |
| <b>Reverse</b>   | FerP6_5962R        | TGRGTTTGCCATTC                  |
| <b>Forward</b>   | FerP7_5854F        | TGATCCAGATYGAGATG               |
| <b>Reverse</b>   | FerP7_7367R        | AGTGAGAATGTDGGTAT               |

|                |               |                         |
|----------------|---------------|-------------------------|
| <b>Forward</b> | FerP8o_7532F  | AAATCCTGCAGTACCGTGGCA   |
| <b>Reverse</b> | FerP8o_7532R  | AGATATCTGTGTAAACTCCTG   |
| <b>Forward</b> | FerP8i_7647F  | GCACTCTACCCCAGTGTTGG    |
| <b>Reverse</b> | FerP8i_8045R  | TTCTATCCAGCTTATTCTTAT   |
| <b>Forward</b> | FerP1_44F     | GCAGAGATTTTCTCTTTCTT    |
| <b>Reverse</b> | FerP1_1381R   | AGCTCTCATTTTGTATGTCAT   |
| <b>Forward</b> | FerP9o_9618   | TAGAGGCTGTTACTGCTGC     |
| <b>Reverse</b> | FerP9o_10244  | CATCTTGCAAATAATCTGCC    |
| <b>Forward</b> | FerP9i_9661F  | ATGAGAGCYGCACARGT       |
| <b>Reverse</b> | FerP9i_10226R | ACTGCRGAGACTCTCAC       |
| <b>Forward</b> | FerP12_10393F | GTGAGAGTCTCYGCAGT       |
| <b>Reverse</b> | FerP12_11024R | CTRGACCTGTCACRGA        |
| <b>Forward</b> | FerP13_11008F | TAGACTGGGCATCRGATCC     |
| <b>Reverse</b> | FerP13_11933R | CCRAGBACCCAATATCTRCT    |
| <b>Forward</b> | FerP14_11693F | AARTGGACAATTTCHGG       |
| <b>Reverse</b> | FerP14_13691R | TCTGAGTGAACRARTGA       |
| <b>Forward</b> | FerP15_13453F | CYTGGGTAGGRAATGA        |
| <b>Reverse</b> | FerP15_14384R | AGGGRAAATATGAAYAAG A    |
| <b>Forward</b> | FerP16_14306F | ATCCAATAAGAATAAGCTGGAT  |
| <b>Reverse</b> | FerP16_15376R | GACCAAAGGATCGGAA        |
| <b>Forward</b> | FerP17_8094F  | ACTCAACCGGGTGTGTTAG     |
| <b>Reverse</b> | FerP17_9801R  | GTATGGTTTCATCAGTCCTCCAT |
| <b>Forward</b> | FerP18_7329F  | GCAGAGATTTTCTCTTTCTT    |
| <b>Reverse</b> | FerP18_7804R  | AGCTCTCATTTTGTATGTCAT   |

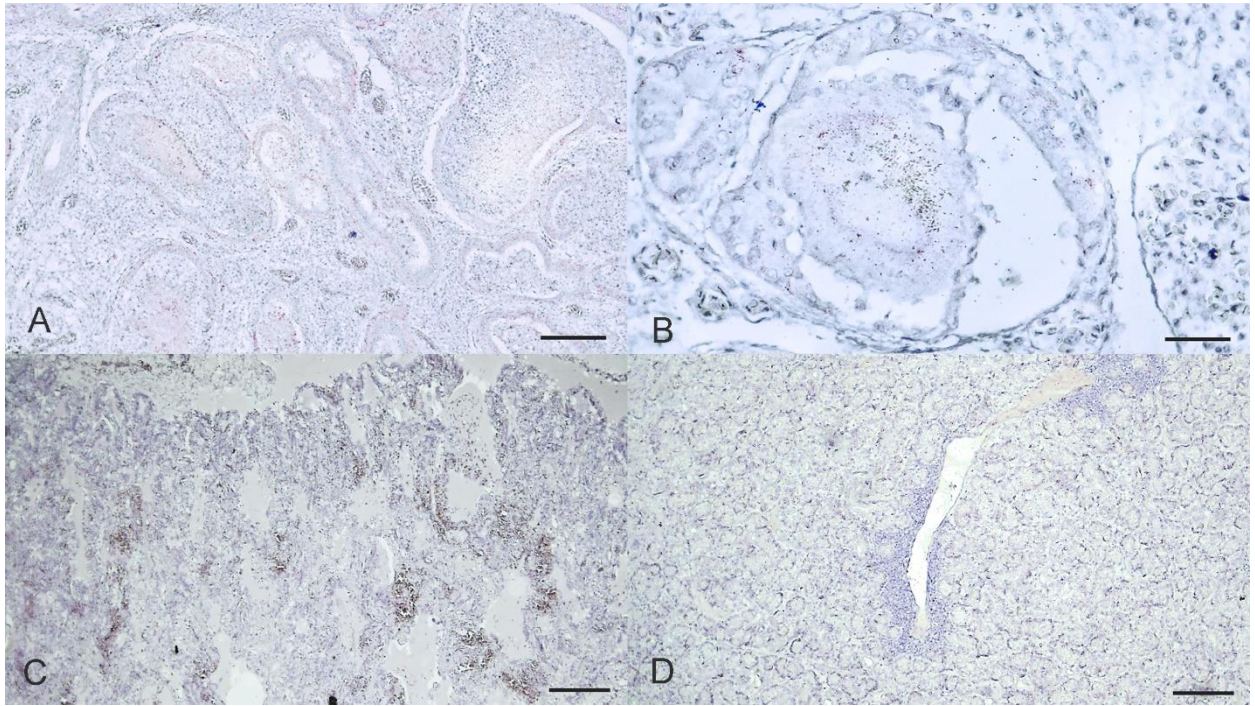

**Supplementary Fig. S1.** Reptilian ferlavirus infection. *In situ* hybridization. Epididymis. (A & B). Big-eyed viper (colony A). No hybridization signals were detected in the sections incubating with feline bocavirus probe. Lung (C.) and kidney(D). Boa constrictor (ferlavirus-PCR negative sections). No hybridization signals were found in the ferlavirus-PCR negative sections incubating with ferlavirus ISH probe. Bars indicate 250  $\mu$ m.
